# Supplementary material
Source: MDPI journal article supplement (https://www.mdpi.com/2071-1050/10/6/1695)
Supplement: s1 [file s1]

# Bridging the gaps for a 'circular' bio-economy: selection criteria, bio-based value chain and stakeholder mapping

## Supplementary information

**Table S1: Bioeconomy initiatives and strategies analysed for the second round of the value chain assessment and selection**

| <b>Member state</b> | <b>Scheme</b>                                                                | <b>Year</b>  | <b>Emphasis</b>                                                                                                                               | <b>Nature of initiative</b>                    |
|---------------------|------------------------------------------------------------------------------|--------------|-----------------------------------------------------------------------------------------------------------------------------------------------|------------------------------------------------|
| Austria             | Eco-Electricity act                                                          | 2011         | Renewable energy generation                                                                                                                   | Policy and implementation                      |
| Czech republic      | Czech republic bioeconomy initiative                                         | 2013         | General plan for bioeconomy                                                                                                                   | Action plan                                    |
| Denmark             | Growth plan for water, bio and environmental solutions                       | 2013         | Knowledge and production based for bio-based product, create a market pull                                                                    | Innovation and creation of demand              |
| Estonia             | Development Plan on the Promotion of Biomass and Bioenergy Use for 2007–2013 | 2015-2021    | Development of domestic biomass for bioenergy use and reduce dependence on fossil energy                                                      | Action plan                                    |
| EU                  | Marine Strategy Framework Directive                                          | 2015-2020    | Fisheries                                                                                                                                     | Policy                                         |
| EU                  | Circular Economy Package                                                     | 2015-2020    | Creating industrial symbiosis between various sectors and closing the material loop                                                           | Implementation                                 |
| EU                  | Climate change strategy                                                      | 2015-2030    | Increase share of renewable, clean energy while reducing overall energy footprint. Develop adaptive capacity to the effects of climate change | Implementation                                 |
| EU                  | Single Market strategy                                                       | 2015         | Not precisely targeting bioeconomy development but has relevant measures                                                                      | Policy strategy including a number of measures |
| EU                  | Promotion of sustainable mobilisation of wood                                | 2007-ongoing | Policies for management of wood resources                                                                                                     | Policy and implementation                      |

|         |                                                  |              |                                                                                                                                 |                                                                                                         |
|---------|--------------------------------------------------|--------------|---------------------------------------------------------------------------------------------------------------------------------|---------------------------------------------------------------------------------------------------------|
| EU      | Energy Union                                     | 2014-ongoing | Energy security and efficiency                                                                                                  | Policy and implementation                                                                               |
| Finland | Rural Development Programme of Mainland Finland  | 2007-2013    | Not precisely targeting bioeconomy development but has relevant measures                                                        | Identifying innovative measures to fund and develop further                                             |
| France  | New Industrial France Policy                     | 2013         | Industrial bioeconomy plan                                                                                                      | 34 Industrial plans available to promote the industrial sector down the green chemicals and energy path |
| France  | National waste plan                              | 2014-2020    | Waste reduction targets                                                                                                         | Plan and implementation                                                                                 |
| France  | French Chemical industry road map                | 2013         | -                                                                                                                               | -                                                                                                       |
| France  | Action plan for wood processing industries       | 2013         | Sustainable forestry resource management : research and innovation                                                              | -                                                                                                       |
| Germany | New Products: made from nature                   | 2012         | Inform business community of the significance and opportunities of bio-based products (sourced from natural renewable material) | Information                                                                                             |
| Germany | National research strategy: bioeconomy 2030      | 2013         | Inform business community of the significance and opportunities of bio-based products (sourced from natural renewable material) | Policy                                                                                                  |
| Germany | Quality check-Sustainability standard project    | 2013         | Product labelling on product's sustainability performance                                                                       | Labelling / information                                                                                 |
| Germany | National Action plan for substance recovery from | 2009-2010    | Research and development of techniques to recover                                                                               | Information/ research strategy                                                                          |

|             |                                                                                |              |                                                                                                                                               |                                                             |
|-------------|--------------------------------------------------------------------------------|--------------|-----------------------------------------------------------------------------------------------------------------------------------------------|-------------------------------------------------------------|
|             | renewable raw material                                                         |              | useful material from biomass and application                                                                                                  |                                                             |
| Germany     | Biorefineries road map                                                         | 2012         | Development of an awareness on the present and future bio refining technologies                                                               | Information                                                 |
| Hungary     | National Environmental Technology Innovation Strategy                          | 2011         |                                                                                                                                               | Industrial sector implementation                            |
| Ireland     | TEAGASC: The agriculture and food development authority                        | 2008         | Research and innovation in the agri-food sector via stakeholder engagement                                                                    | Research and innovation investment                          |
| Ireland     | Ireland waste management policy                                                | 2012-ongoing | Policies and implementation for waste management                                                                                              |                                                             |
| Italy       | Italian Bioeconomy strategy                                                    | 2014-2020    | Policy framework to prioritise funding for bio-based industries and agro-food sector                                                          | Policy                                                      |
| Italy       | Environmental Annex to the Stability Law                                       | 2014         | Circular Economy via Green Public Procurement (GPP)                                                                                           | Policy                                                      |
| Italy       | Environmental minimum criteria - Green public procurement National Action Plan | 2016         | Companies and service providers to the public authority are required to adopt this to apply for public tenders                                | Policy                                                      |
| Italy       | National programme for waste reduction                                         | 2016         | 50% share of "green purchases"; valorisation of agri-sector by-products;                                                                      | Potential measure                                           |
| Latvia      | Bioeconomy strategy under development                                          | -            | -                                                                                                                                             | -                                                           |
| Netherlands | Program Biobased Economy (BBE)                                                 | 2012         | Technological innovation and market development along all biomass value chains, mainly vegetable and animal biomass for non-food applications | Co-ordination and management function within the government |

|             |                                                |           |                                                                                                                                                                            |                                                                                                                     |
|-------------|------------------------------------------------|-----------|----------------------------------------------------------------------------------------------------------------------------------------------------------------------------|---------------------------------------------------------------------------------------------------------------------|
|             |                                                |           | (materials, chemicals, energy and biofuels)                                                                                                                                |                                                                                                                     |
| Netherlands | Biorenewables Business Platform (BBP)          | 2010      | Sustainable production of biomass, sustainable import chains, co-production of biochemical, biomaterials and biofuels, production of green gas, innovations in biochemical | Multi-stakeholder platform promoting structural changes in the agro and industrial sectors and in the energy supply |
| Netherlands | Platform Agro-Paper Chemistry                  | 2011      | Lignocellulose as a raw material. Chemical building blocks from plants. Protein cascading                                                                                  | Industrial partnership of agrifood, paper and chemical industries                                                   |
| Netherlands | Bio based Business accelerator                 | 2012      | Energy, waste & organic residues, materials, (fine) chemistry, food, agro, water and green space                                                                           | Network of companies, governments, knowledge institutions and intermediaries / service providers                    |
| Netherlands | Dutch Biorefinery Cluster                      | 2014      | Concept of total merit of the raw materials and residual flows: Water, fiber, protein and minerals, etc                                                                    | Multi-stakeholder initiative driven by business with support of research institutions and government agencies       |
| Netherlands | Action plan for increasing resource efficiency | 2012      | General material use efficiency                                                                                                                                            | Action plan                                                                                                         |
| Slovenia    | Strategy of Agriculture                        | 2012-2020 | Focus on food-security, sustainable production, products from agri-food industry other than food and feed and sustainable rural development                                | Action plan                                                                                                         |
| Slovenia    | Rural development plan                         | 2014-2020 | Sustainable supply and use of renewable energy sources and agri-food resources                                                                                             | Action plan                                                                                                         |

|        |                                            |      |                                                                                                                                                                                                                                                                                                                                                           |                                                                  |
|--------|--------------------------------------------|------|-----------------------------------------------------------------------------------------------------------------------------------------------------------------------------------------------------------------------------------------------------------------------------------------------------------------------------------------------------------|------------------------------------------------------------------|
| Spain  | Spanish Bioeconomy strategy – 2030 Horizon | 2016 | Strategic advancement and maintenance of competitiveness in efficient use of agricultural by-products and agro-forestry products like wood, cork, resin and timber for paper and other bio-based products. Potential for use of agricultural by-products comes from responsible intensification and sustainability of the primary food production systems | Implementation                                                   |
| Sweden | Swedish Research and Bioeconomy strategy   | 2012 | General bioeconomy plan                                                                                                                                                                                                                                                                                                                                   | Research and innovation strategy ; No strategy available as yet. |
